# Supplementary material for: Framework for the Design of a Small Transport Hub as an Interdisciplinary Challenge to Implement Sustainable Solutions
Source: MDPI journal article supplement (doi:10.3390/su151410975), 2023-07-13
Supplement: s1 [file s1]

Archive with 1 entries (1 files):
- sustainability-2442283-supplementary.pdf
