# Supplementary material for: Framework for the Design of a Small Transport Hub as an Interdisciplinary Challenge to Implement Sustainable Solutions
Source: MDPI journal article supplement (doi:10.3390/su151410975), 2023-07-13
Supplement: s1 [file s1 › sustainability-2442283-supplementary.pdf]

## A CHECKLIST/CATALOGUE

with an overview of sustainable solutions that may be applied  
in the design of transport hubs in small towns in the **I dimension – ACCESSIBILITY**

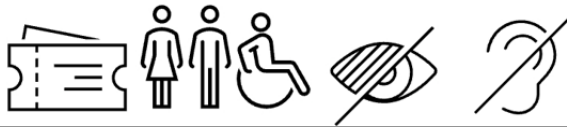

# ACCESSIBILITY

|         |                                                                                   | compulsory | optional | needed |         |                                                                 | compulsory | optional | needed |
|---------|-----------------------------------------------------------------------------------|------------|----------|--------|---------|-----------------------------------------------------------------|------------|----------|--------|
| TA      | transport accessibility                                                           |            |          |        | PS      | passenger service                                               |            |          |        |
| BS      | allocated bus stands                                                              |            |          |        | WR      | waiting room building                                           |            |          |        |
| CS      | cab stands                                                                        |            |          |        | OB      | possibility to observe bus stands from the waiting room         |            |          |        |
| DP      | diversified parking lots, incl.:                                                  |            |          |        | WC      | toilet for travelers                                            |            |          |        |
| PP      | public parking lots                                                               |            |          |        | TS      | traveler service point                                          |            |          |        |
| K&R     | Kiss & ride stands                                                                |            |          |        | TO      | ticket office                                                   |            |          |        |
| P&R     | Park & ride parking                                                               |            |          |        | TM      | ticket machines                                                 |            |          |        |
| PP      | pedestrian priority, incl.:                                                       |            |          |        | IB      | information board with timetables                               |            |          |        |
| PS      | pedestrian sidewalks                                                              |            |          |        | RS      | roofed bus shelters                                             |            |          |        |
| PC      | designated and marked pedestrian crossings                                        |            |          |        | LL      | luggage lockers                                                 |            |          |        |
| IC      | infrastructure for cyclists, incl.:                                               |            |          |        | CS      | comfortable seats and street furniture                          |            |          |        |
| BP      | bicycle or pedestrian & bicycle path                                              |            |          |        | OL      | outdoor lighting                                                |            |          |        |
| BR      | bicycle rugs                                                                      |            |          |        | MO      | monitoring                                                      |            |          |        |
| CB      | City/electric bicycle/scooter stations                                            |            |          |        | WG      | waste garbage cans                                              |            |          |        |
| OS / TA | other solutions to improve transportation accessibility                           |            |          |        | OS / PS | other solutions to improve passenger service                    |            |          |        |
| FD      | assistive technologies and facilities for PwD and PwSN                            |            |          |        | IA      | inclusive and interactive activities                            |            |          |        |
| MT      | multimedia info terminal adapted to the needs of PwD <sup>1)</sup>                |            |          |        | TI      | tourist information point                                       |            |          |        |
|         |                                                                                   |            |          |        | TF      | tactile city plan                                               |            |          |        |
| SN      | space dedicated for non-neurotypical persons and accompanying persons             |            |          |        | AE      | advertising and outdoor exhibition stands                       |            |          |        |
| HS      | horizontal stripes on glazing to protect the visually impaired                    |            |          |        | SF      | street furniture / seats / benches / parklet                    |            |          |        |
| WC      | toilet adapted to the needs of PwD                                                |            |          |        | WF      | water fountain                                                  |            |          |        |
| WC      | toilet adapted to the needs of a parent with a child                              |            |          |        | FP      | kiosk / food service point                                      |            |          |        |
| SD      | signage adapted to the needs of PwD, incl.:                                       |            |          |        | LG      | landscaped greenery                                             |            |          |        |
| TM      | tactile markings of pedestrian crossings / bus stands                             |            |          |        | OS / IA | other solutions to improve inclusive and interactive activities |            |          |        |
| TP      | tactile pavements and guidance lanes                                              |            |          |        |         |                                                                 |            |          |        |
| BS      | signage in Braille                                                                |            |          |        |         |                                                                 |            |          |        |
| AD      | audio description signage                                                         |            |          |        |         |                                                                 |            |          |        |
| AI      | information / audible signals                                                     |            |          |        |         |                                                                 |            |          |        |
| IL      | induction loop                                                                    |            |          |        |         |                                                                 |            |          |        |
| LC      | no or lowered curbs                                                               |            |          |        |         |                                                                 |            |          |        |
| PD      | parking lot for the disabled                                                      |            |          |        |         |                                                                 |            |          |        |
| OS / FD | other solutions to improve assistive technologies and facilities for PwD and PwSN |            |          |        |         |                                                                 |            |          |        |

## A CHECKLIST/CATALOGUE

with an overview of sustainable solutions that may be applied  
in the design of transport hubs in small towns in the **II dimension – ECOLOGY**

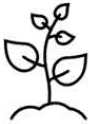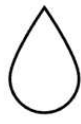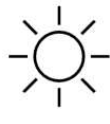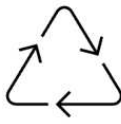

# ECOLOGY

|         |                                                                            | compulsory | optional | needed |         |                                                                                                       | compulsory | optional | needed |
|---------|----------------------------------------------------------------------------|------------|----------|--------|---------|-------------------------------------------------------------------------------------------------------|------------|----------|--------|
| GS      | 'green' solutions                                                          |            |          |        | RS      | retention of stormwater                                                                               |            |          |        |
| BAI     | biologically active area increase                                          |            |          |        | RG      | rain garden                                                                                           |            |          |        |
| GP      | 'green' partitions, incl.:                                                 |            |          |        | RT      | retention tank / basin                                                                                |            |          |        |
| GR      | green roofs                                                                |            |          |        | RR      | RP use of rainwater for watering plants, RR use of water from green roofs in the building water cycle |            |          |        |
| GW      | green walls                                                                |            |          |        |         |                                                                                                       |            |          |        |
| GS      | green bus shelters / green canopies                                        |            |          |        |         |                                                                                                       |            |          |        |
| GL      | greening and landscaping incl.:                                            |            |          |        | RP      | use of rainwater for watering plants                                                                  |            |          |        |
| TG      | tall greenery (trees)                                                      |            |          |        | PP      | permeable or unsealed pavements (overgrown with vegetation)                                           |            |          |        |
| MG      | medium-high greenery (shrubs, tall grasses, etc.)                          |            |          |        |         |                                                                                                       |            |          |        |
| LG      | low vegetation (lawns, flower meadows, perennial plants, grasses, etc.)    |            |          |        | OS / RS | other solutions conducive to retention                                                                |            |          |        |
| CP      | climbing plants                                                            |            |          |        |         |                                                                                                       |            |          |        |
| PC      | plants in containers                                                       |            |          |        |         |                                                                                                       |            |          |        |
| OS / GS | other solutions to increase the amount of greenery/ecological connectivity |            |          |        |         |                                                                                                       |            |          |        |
| RE      | energy efficiency / renewable energy sources                               |            |          |        | RC      | recycling                                                                                             |            |          |        |
| SF      | solar or photovoltaic panels / rooftops                                    |            |          |        | RM      | recycled and/or recyclable building materials                                                         |            |          |        |
| SL      | solar lighting                                                             |            |          |        | RW      | recycled waste containers                                                                             |            |          |        |
| EI      | energy-efficient electrical / thermal installations                        |            |          |        | OS / RC | other recycling solutions                                                                             |            |          |        |
| CSt     | Electric car charging stations                                             |            |          |        |         |                                                                                                       |            |          |        |
| OS / RE | other solutions to foster energy efficiency and self-sufficiency           |            |          |        |         |                                                                                                       |            |          |        |

## A CHECKLIST/CATALOGUE

with an overview of sustainable solutions that may be applied  
in the design of transport hubs in small towns in the **III dimension – FUNCTIONALITY**

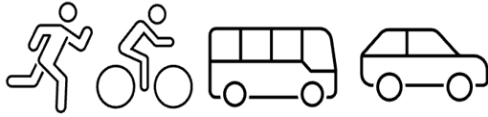

# FUNCTIONALITY

|         |                                                               | compulsory | optional | needed |         |                                                          | compulsory | optional | needed |
|---------|---------------------------------------------------------------|------------|----------|--------|---------|----------------------------------------------------------|------------|----------|--------|
| TS      | safety of travelers                                           |            |          |        | TC      | comfort of travelers                                     |            |          |        |
| PP      | priority for pedestrians                                      |            |          |        | TM      | ticket machines                                          |            |          |        |
| RC      | reducing the number of pedestrian crossings                   |            |          |        | WC      | public toilet                                            |            |          |        |
| RP      | raised platforms / lack of curbs / raised pedestrian crossing |            |          |        | SB      | weather-sheltered bus stops                              |            |          |        |
| NS      | non-slip pedestrian surfaces and pavements                    |            |          |        | PC      | protective canopies against sun and rain                 |            |          |        |
| BP      | separated bicycle path                                        |            |          |        | CS      | comfortable seats and street furniture                   |            |          |        |
| SV      | chicanes and humps to slow down vehicle traffic               |            |          |        | LG      | landscaped greenery                                      |            |          |        |
| OS / TS | other design solutions to improve safety of travelers         |            |          |        | CI      | infrastructure for cyclists (stands, city cycle station) |            |          |        |
|         |                                                               |            |          |        | WF      | water fountains                                          |            |          |        |
|         |                                                               |            |          |        | OS / TC | other solutions to improve the comfort of travelers      |            |          |        |

## A CHECKLIST/CATALOGUE

with an overview of sustainable solutions that may be applied  
in the design of transport hubs in small towns in the **IV dimension – IDENTITY**

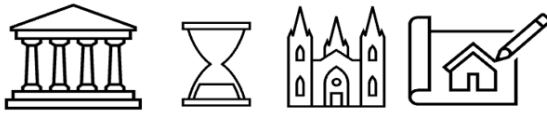

# IDENTITY

|       |                                                        | compulsory | optional | needed |    |                                                     | compulsory | optional | needed |
|-------|--------------------------------------------------------|------------|----------|--------|----|-----------------------------------------------------|------------|----------|--------|
| CSI   | city symbols and identification                        |            |          |        | GL | geographic location                                 |            |          |        |
| CC    | city crest                                             |            |          |        | GT | geographical positioning / identifying 'totem' sign |            |          |        |
| CF    | city flag                                              |            |          |        | CG | bus station as 'the city gate'                      |            |          |        |
| CI    | city logo / official identification of the city        |            |          |        |    |                                                     |            |          |        |
| HT    | history                                                |            |          |        | AT | architectural and building traditions               |            |          |        |
| MC    | Multiculturalism – <i>social history</i>               |            |          |        | WA | traditional architectural forms and details         |            |          |        |
| HR    | historic roads                                         |            |          |        | LM | local building materials                            |            |          |        |
| MM/HD | micro-museum/ heritage display                         |            |          |        | TC | traditional colors in architecture                  |            |          |        |
| LT    | local traditions (to be defined depending on the site) |            |          |        | LL | local landscape                                     |            |          |        |
|       | Famous city-inhabitants/ historic figures              |            |          |        | NV | native vegetation, including:                       |            |          |        |
|       |                                                        |            |          |        | MV | field and meadow vegetation                         |            |          |        |
|       |                                                        |            |          |        | RV | roadside vegetation                                 |            |          |        |
|       |                                                        |            |          |        | RV | roadside vegetation                                 |            |          |        |
|       |                                                        |            |          |        | TH | trees compatible with the natural habitat           |            |          |        |
